# Supplementary material
Source: PubMed Central journal article supplement (PMC2891344)
Supplement: NIHMS159882-supplement-supplement_1.pdf [file NIHMS159882-supplement-supplement_1.pdf]

## Supplementary Materials

### Experiment 1 Materials (with average naturalness rating for initial event on 1-5 scale)

|                                                                                                       |           |
|-------------------------------------------------------------------------------------------------------|-----------|
| 1a/c) After flavoring the roasts with some syrup/gravy, Susan served them to the guests.              | 3 / 1.6   |
| 1b/d) After the roasts were flavored with some syrup/gravy, Susan served them to the guests.          |           |
| 2a/c) After covering the wounds with a scarf/some gauze, Kevin found band-aids for them.              | 2.6 / 1   |
| 2b/d) After the wounds were covered with a scarf/ some gauze, Kevin found band-aids for them.         |           |
| 3a/c) After teaching ventriloquism techniques using a fable/dummy, Fiona went home.                   | 3.4 / 1.8 |
| 3b/d) After ventriloquism techniques were taught using a fable/dummy, Fiona went home.                |           |
| 4a/c) After eliminating the bacteria with a spear/toxin, Harold felt better.                          | 4.8 / 3   |
| 4b/d) After the bacteria were eliminated with a spear/toxin, Harold felt better.                      |           |
| 5a/c) After catching the baseball in her lasso/glove, Tracy threw it to first base.                   | 4.2 / 1.2 |
| 5b/d) After the baseball was caught in her lasso/glove, Tracy threw it to first base.                 |           |
| 6a/c) After scraping the plates with a spade/spoon, Peter put them in the sink.                       | 3.4 / 1.6 |
| 6b/d) After the plates were scraped with a spade/spoon, Peter put them in the sink.                   |           |
| 7a/c) After moving the hay on a stretcher/with a pitchfork, Holly stored it in the barn.              | 3.6 / 1.6 |
| 7b/d) After the hay was moved on a stretcher/with a pitchfork, Holly stored it in the barn.           |           |
| 8a/c) After constructing the boxes out of chocolate/cardboard, Caitlin added some details.            | 3.6 / 1   |
| 8b/d) After the boxes were constructed out of chocolate/cardboard, Caitlin added some details.        |           |
| 9a/c) After adorning the napkins with a chandelier/some embroidery, Debbie went to buy flowers.       | 5 / 2     |
| 9b/d) After the napkins were adorned with a chandelier/some embroidery, Debbie went to buy flowers.   |           |
| 10a/c) After identifying the shorebirds using a microscope/ from a photograph, Alex wrote a note.     | 3.8 / 1.6 |
| 10b/d) After the shorebirds were identified using a microscope/ from a photograph, Alex wrote a note. |           |
| 11a/c) After protecting the castle with a canopy/bunker, the troops secured the drawbridge.           | 4.4 / 2.8 |
| 11b/d) After the castle was protected with a canopy/bunker, the troops secured the drawbridge.        |           |
| 12a/c) After filling the oil tank using a kettle/funnel, Evan checked the antifreeze levels.          | 4.4 / 2.6 |
| 12b/d) After the oil tank was filled using a kettle/funnel, Evan checked the antifreeze levels.       |           |
| 13a/c) After cleaning the blackboards with a napkin/an eraser, Patricia got out new chalk.            | 2.8 / 2.2 |
| 13b/d) After the blackboards were cleaned with a napkin/an eraser, Patricia got out new chalk.        |           |
| 14a/c) After illustrating the research results in a mosaic/poster, David asked for help.              | 3.4 / 1.4 |
| 14b/d) After the research results were illustrated in a mosaic/poster, David asked for help.          |           |
| 15a/c) After attacking the ships using a hammer/cannon, Blackbeard's crew boarded them.               | 3.8 / 1.8 |
| 15b/d) After the ships had been attacked using a hammer/cannon, Blackbeard's crew boarded them.       |           |

|                                                                                                              |           |
|--------------------------------------------------------------------------------------------------------------|-----------|
| 16a/c) After transporting the popsicles in a bucket/cooler, the clown went to the freezer.                   | 2.8 / 1.8 |
| 16b/d) After the popsicles were transported in a bucket/cooler, the clown went to the freezer.               |           |
| 17a/c) After scaling the wall with a ticket/ladder, Julia jumped down into the interior.                     | 4.8 / 1   |
| 17b/d) After the wall was scaled with a ticket/ladder, Julia jumped down into the interior.                  |           |
| 18a/c) After tying the beef roast with some ribbon/string, Mark put it in the oven.                          | 3.4 / 2.6 |
| 18b/d) After the beef roast was tied with some ribbon/string, Mark put it in the oven.                       |           |
| 19a/c) After embellishing the dresses with some lacquer/taffeta, Elaine started on a purse.                  | 4.4 / 3   |
| 19b/d) After the dresses were embellished with some lacquer/taffeta, Elaine started on a purse.              |           |
| 20a/c) After studying the heartbeats in the observatory/ with a stethoscope, Ed watched the patient.         | 4.2 / 1   |
| 20b/d) After the heartbeats had been studied in the observatory/ with a stethoscope, Ed watched the patient. |           |
| 21a/c) After delivering the adrenaline by messenger/injection, Tom took John's pulse.                        | 4.6 / 2   |
| 21b/d) After the adrenaline had been delivered by messenger/injection, Tom took John's pulse.                |           |
| 22a/c) After protecting the ammunition under an umbrella/ in a fortress, Craig left.                         | 3.6 / 2   |
| 22b/d) After the ammunition had been protected under an umbrella/ in a fortress, Craig left.                 |           |
| 23a/c) After cleaning the dirty glassware with some shampoo/solvent, Kari wiped the counter.                 | 2.8 / 1.8 |
| 23b/d) After the dirty glassware was cleaned with some shampoo/solvent, Kari wiped the counter.              |           |
| 24a/c) After transporting the cattle in a helicopter/locomotive, the farmer released them.                   | 3.8 / 2.4 |
| 24b/d) After the cattle were transported in a helicopter/locomotive, the farmer released them.               |           |
| 25a/c) After making the dessert from some cement/a recipe, Ben made himself an iced tea.                     | 5 / 1     |
| 25b/d) After the dessert had been made from some cement/a recipe, Ben made himself an iced tea.              |           |
| 26a/c) After controlling the water temperature with a leash/valve, Jill took a shower.                       | 4.4 / 1.8 |
| 26b/d) After the water temperature had been controlled with a leash/valve, Jill took a shower.               |           |
| 27a/c) After lifting the injured dog with a crane/sling, the veterinarian examined it.                       | 4 / 2.6   |
| 27b/d) After the injured dog was lifted with a crane/sling, the veterinarian examined it.                    |           |
| 28a/c) After measuring the voltage with a ruler/meter, the electrician replaced the wiring.                  | 5 / 1.2   |
| 28b/d) After the voltage was measured with a ruler/meter, the electrician replaced the wiring.               |           |
| 29a/c) After threatening the suspects with a feather/bayonet, the soldier left the room.                     | 4.6 / 2.6 |
| 29b/d) After the suspects were threatened with a feather/bayonet, the soldier left the room.                 |           |
| 30a/c) After sealing the wood with some asphalt/varnish, George left the bookshelf to dry.                   | 3.6 / 1.6 |
| 30b/d) After the wood was sealed with some asphalt/varnish, George left the bookshelf to dry.                |           |
| 31a/c) After safeguarding the valuables with a vaccine/padlock, Eddie left for vacation.                     | 4.2 / 1   |
| 31b/d) After the valuables had been safeguarded with a vaccine/padlock, Eddie left for vacation.             |           |
| 32a/c) After celebrating the anniversary with an explosion/some champagne, the couple kissed.                | 2.6 / 1   |
| 32b/d) After the anniversary had been celebrated with an explosion/some champagne, the couple kissed.        |           |

Experiment 2 Stimuli (with average naturalness rating for verb-object on 1-7 scale, followed by average naturalness rating for sentence through critical word on 1-5 scale).

|                                                                           |     |     |
|---------------------------------------------------------------------------|-----|-----|
| 1 Paul used a spoon to eat the hot chili during lunch.                    | 1.5 | 1   |
| 1 Paul used a spoon to gouge the hot chili during lunch.                  | 4.3 | 3.4 |
| 1 Paul used chopsticks to eat the hot chili during lunch.                 |     | 4.4 |
| 2 Steve used a backhoe to dig the deep reservoir in the woods.            | 2.8 | 2.7 |
| 2 Steve used a backhoe to remove the deep reservoir in the woods.         | 5.3 | 4.3 |
| 2 Steve used a snow shovel to dig the deep reservoir in the woods.        |     | 3.3 |
| 3 Susan used a cup to measure the white flour for the recipe.             | 1.5 | 1   |
| 3 Susan used a cup to sip the white flour for the recipe.                 | 6.1 | 4   |
| 3 Susan used a ruler to measure the white flour for the recipe.           |     | 4   |
| 4 Nick used a tank to hold the active angelfish in his room.              | 5.8 | 1.1 |
| 4 Nick used a tank to destroy the active angelfish in his room.           | 6.1 | 3.9 |
| 4 Nick used a playpen to hold the active angelfish in his room.           |     | 4.7 |
| 5 Kate used a sheet to cover the cold child on Friday night.              | 1.5 | 1.7 |
| 5 Kate used a sheet to escape from the cold child on Friday night.        | 5.7 | 4.1 |
| 5 Kate used a tarp to cover the cold child on Friday night.               |     | 2.9 |
| 6 Sean used a keyboard to play the difficult melody in the concert.       | 1.9 | 1.3 |
| 6 Sean used a keyboard to type the difficult melody in the concert.       | 4.9 | 2.4 |
| 6 Sean used a rubber band to play the difficult melody in the concert.    |     | 3.7 |
| 7 Calvin used a hook to catch the large salmon in northern Oregon.        | 1.6 | 1.6 |
| 7 Calvin used a hook to hang the large salmon in northern Oregon.         | 3.9 | 2.1 |
| 7 Calvin used a snare to catch the large salmon in northern Oregon.       |     | 3.1 |
| 8 Molly used a skillet to cook the fluffy pancakes for Sunday breakfast.  | 1.6 | 1.1 |
| 8 Molly used a skillet to smash the fluffy pancakes for Sunday breakfast. | 5.8 | 3.7 |
| 8 Molly used a wok to cook the fluffy pancakes for Sunday breakfast.      |     | 3.6 |
| 9 Jake used a towel to dry the small poodle on the porch.                 | 2.4 | 1.1 |
| 9 Jake used a towel to catch the small poodle on the porch.               | 3.5 | 2.7 |
| 9 Jake used a fire to dry the small poodle on the porch.                  |     | 3.9 |
| 10 Mike used a shovel to bury the orange goldfish on the hill.            | 2.6 | 1.3 |
| 10 Mike used a shovel to scatter the orange goldfish on the hill.         | 5.5 | 4.3 |
| 10 Mike used an excavator to bury the orange goldfish on the hill.        |     | 4.6 |
| 11 Jenny used her hand to press the orange button on the panel.           | 2.4 | 1.4 |
| 11 Jenny used her hand to pet the orange button on the panel.             | 6.4 | 4   |
| 11 Jenny used her iron to press the orange button on the panel.           |     | 3.9 |
| 12 Ben used a shield to deflect the large arrows during battle.           | 4.3 | 1.1 |
| 12 Ben used a shield to protect the large arrows during battle.           | 6.2 | 3.3 |
| 12 Ben used a tray to deflect the large arrows during battle.             |     | 3.3 |
| 13 Dan used a razor to trim the unruly beard on Tuesday morning.          | 1.6 | 1.6 |
| 13 Dan used a razor to threaten the unruly beard on Tuesday morning.      | 6.1 | 3.6 |
| 13 Dan used hedge clippers to trim the unruly beard on Tuesday morning.   |     | 3.9 |
| 14 Amy used an alarm to protect the new house over winter vacation.       | 2.1 | 1.1 |

|                                                                                       |     |     |
|---------------------------------------------------------------------------------------|-----|-----|
| 14 Amy used an alarm to wake the new house over winter vacation.                      | 6.9 | 4.6 |
| 14 Amy used packing peanuts to protect the new house over winter vacation.            |     | 4.3 |
| 15 Bill used a fan to cool the large bedroom in the summer.                           | 1.6 | 1.1 |
| 15 Bill used a fan to clear the large bedroom in the summer.                          | 2.3 | 3.7 |
| 15 Bill used dry ice to cool the large bedroom in the summer.                         |     | 3.9 |
| 16 Colette used a car to drive the young children to elementary school.               | 1.7 | 1   |
| 16 Colette used a car to lead the young children to elementary school.                | 1.2 | 3.4 |
| 16 Colette used an eighteen-wheeler to drive the young children to elementary school. |     | 3.1 |
| 17 Jason used a cloth to clean the white dishes in the sink.                          | 2.1 | 1.6 |
| 17 Jason used a cloth to wax the white dishes in the sink.                            | 5.7 | 4   |
| 17 Jason used a toothbrush to clean the white dishes in the sink.                     |     | 3   |
| 18 Diana used scissors to cut the long thread on her shirt.                           | 2   | 1   |
| 18 Diana used scissors to stab the long thread on her shirt.                          | 6.4 | 4.1 |
| 18 Diana used a saw to cut the long thread on her shirt.                              |     | 3.9 |
| 19 Kevin used some thread to stitch up the open incision in the emergency room.       | 1.4 | 2   |
| 19 Kevin used some thread to embroider the open incision in the emergency room.       | 6.5 | 4.1 |
| 19 Kevin used some yarn to stitch up the open incision in the emergency room.         |     | 4.4 |
| 20 Bryan used a bottle to feed the hungry infant yesterday morning.                   | 1.1 | 1.1 |
| 20 Bryan used a bottle to fight off the hungry infant yesterday morning.              | 6.5 | 3.6 |
| 20 Bryan used a trough to feed the hungry infant yesterday morning.                   |     | 3.9 |
| 21 Nancy used a spotlight to illuminate the twirling acrobat in the circus.           | 3.4 | 1.6 |
| 21 Nancy used a spotlight to blind the twirling acrobat in the circus.                | 6.4 | 2.1 |
| 21 Nancy used a candle to illuminate the twirling acrobat in the circus.              |     | 3.1 |
| 22 Rob used glasses to see the green chalkboard in calculus class.                    | 1.4 | 1   |
| 22 Rob used glasses to serve the green chalkboard in calculus class.                  | 6.6 | 4.4 |
| 22 Rob used a microscope to see the green chalkboard in calculus class.               |     | 4.3 |
| 23 Liz used a pipe to drain the green field behind the school.                        | 4.7 | 2.9 |
| 23 Liz used a pipe to smoke the green field behind the school.                        | 6.6 | 4.4 |
| 23 Liz used a strainer to drain the green field behind the school.                    |     | 4.6 |
| 24 Tim used a brush to paint the white ceiling in the garage.                         | 1.7 | 1   |
| 24 Tim used a brush to flatten the white ceiling in the garage.                       | 5.7 | 4.1 |
| 24 Tim used nail polish to paint the white ceiling in the garage.                     |     | 3.9 |
| 25 Laura used traffic cones to mark the partially obscured ditch near the road.       | 2.4 | 1.3 |
| 25 Laura used traffic cones to protect the partially obscured ditch near the road.    | 5.3 | 1.6 |
| 25 Laura used a highlighter to mark the partially obscured ditch near the road.       |     | 4   |
| 26 Brandon used a broom to scare away the pesky mouse in the kitchen.                 | 1.7 | 1.1 |
| 26 Brandon used a broom to sweep away the pesky mouse in the kitchen.                 | 2.5 | 2.4 |
| 26 Brandon used a scarecrow to scare away the pesky mouse in the kitchen.             |     | 3.6 |
| 27 Ann used a crate to ship the yellow lemons to the new house.                       | 2.7 | 1   |
| 27 Ann used a crate to restrict the yellow lemons to the new house.                   | 6.6 | 2.9 |
| 27 Ann used an envelope to ship the yellow lemons to the new house.                   |     | 4.1 |
